# Supplementary material for: Phosphorylation of the N-terminus of Syntaxin-16 controls interaction with mVps45 and GLUT4 trafficking in adipocytes
Source: PeerJ. 2023 Jul 24;11:e15630. doi: 10.7717/peerj.15630 (PMC10373645; doi:10.7717/peerj.15630)
Supplement: Supplemental Information 3 [file peerj-11-15630-s003.xlsx]

## Sheet: Figure 1C
		Control			WT			F10A
Basal		1	1	1	0.87	0.79	1.06	0.96	1.07	0.77
Insulin		1.69	1.4	1.89	0.85	1.17	1.12	1.54	1.39	1.8

## Sheet: Figure 2C
Wildtype	Pocket	Control
	Filled
1.65	1.4	1.76
1.87	1.33	1.81
1.66	2.14	2.1
1.65	1.9	1.55
1.45	1.87	1.87
1.87	2.05	1.67
1.9	2.17	1.63
2.01	1.9	1.82
1.45	2.24	1.9
1.7	2.14	1.75
1.65	2.1	1.56
1.53	1.96	1.66
1.32	1.6	1.53
1.87	1.74	1.51
1.6	1.88
1.38	2.1
1.58	2.01
1.61	2.05
1.92	1.9
1.34	1.88
1.77	2.13
1.45	1.98
1.8	1.77
2.13	1.9
1.45	2.05
1.39	1.9
1.76	1.5
1.55
1.81
1.7

## Sheet: Figure 4C
WT													WT		input	bk
	input control	164.307	133.816	30.491										input	73.787	20.14	53.647
													WT
						% of highest value									vps45/HA bands	adjacent background	minus bk	normalised to input	% of highest value			sx16	adjacent bkground	minus bk
		vps45/HA bands	adjacent background	minus bk	normalised to input			sx16	adjacent bkground	minus bk			10 (omit due to loading error)		141.381	23.19	118.191	2.20312				186.076	23.079	162.997
	20	200.609	119.058	81.551	2.67459	100		225.014	125.25	99.764			5		171.18	22.116	149.064	2.77861	100			172.714	21.936	150.778
	15	192.907	125.942	66.965	2.19622	82.1143		209.094	126.731	82.363			2.5		163.386	23.042	140.344	2.61606	94.1502			141.83	21.243	120.587
	10	206.622	136.885	69.737	2.28713	85.5134		205.838	134.231	71.607			1		108.487	22.788	85.699	1.59746	57.4914			64.424	19.5	44.924
	5	202.142	139.231	62.911	2.06326	77.1431		173.818	136.096	37.722			0.25		33.54	18.614	14.926	0.278226	10.0131			39.634	21.179	18.455
	2.5	194.542	137.596	56.946	1.86763	69.8287		180.413	138.962	41.451			0.1		19.048	18.286	0.762	0.014204	0.51119			19.283	18.921	0.362
	1	195.169	146.731	48.438	1.5886	59.396		158.704	144.288	14.416			0		0	0	0	0	0			0	0	0
	0	0	0	0	0	0		0	0	0
T7D													T7D
	input control	177.353	148.635	28.718
															vps45/HA bands	adjacent background	minus bk	normalised to input				sx16	adjacent bkground	minus bk
		vps45/HA bands	adjacent background	minus bk				sx16	adjacent bkground	minus bk			10		62.173	24.673	37.5	0.699014	100			182.584	28.125	154.459
													5		40.506	25.964	14.542	0.271068	100			152.212	27.917	124.295
	20	217.087	160.988	56.099	1.95344	100		229	166.69	62.6			2.5		27.804	25.399	2.405	0.0448301	16.5383			88.2	26.358	61.842
	15	185.578	157.75	27.828	0.969009	49.6052		215	163.44	51.3			1		30.536	30.137	0.399	0.00743751	2.74378			61.256	31.408	29.848
	10	175.981	161.888	14.093	0.490738	25.1217		200	162.333	37.7			0.25		31.149	30.81	0.339	0.00631909	2.33118			33.372	30.933	2.439
	5	160.149	156.95	3.199	0.111394	5.70242		187	162.119	25.1			0.1		0	0	0	0	0			0	0	0
	2.5	153.876	150.712	3.164	0.110175	5.64003		173	150.512	22
	1	0	0	0	0	0
	0	0	0	0	0	0

## Sheet: Figure 5A
		CONTROL			SX16 WT			SX16 T7A			Sx16 T7D
Basal		20	24	18	21	23	20	23	24	24	26	19	16
Insulin		100	100	100	84	132	78	128	92	78	42	60	31

## Sheet: Figure 6
Exp1		substrate	kinase		Exp2	substrate	kinase
CPM-blank					CPM-blank
17		-	AMPK		0	-	AMPK
98		s16	AMPK		81	s16
53		t7a	AMPK		36	t7a
31		-	AMPK+AMP		0	-	AMPK+AMP
209		s16	AMPK+AMP		170	s16
139		t7a	AMPK+AMP		100	t7a
14		-	SIK2		0	-	SIK2
108		s16	SIK2		94	s16
62		t7a	SIK2		38	t7a
		substrate	kinase	average CPM
		-	AMPK	8.5
		s16	AMPK	89.5
		t7a	AMPK	44.5
		-	AMPK+AMP	16
		s16	AMPK+AMP	189.5
		t7a	AMPK+AMP	119.5
		-	SIK2	7
		s16	SIK2	100
		t7a	SIK2	50

## Sheet: Figure 6D
Condition
1	No cytosol	+SX16 +ATP	100	100	100
2	AMPK WT cytosol	-SX16 +ATP	0	0	0
3		+Sx16 -ATP	120.704	109.737	109.783
4		+Sx16 +ATP	155.099	184.544	195.288
5	AMPK KO cytosol	-SX16 +ATP	0	0	0
6		+Sx16 -ATP	169.714	120.612	130.844
7		+Sx16 +ATP	183.603	154.929	168.741
